# Supplementary material for: Desmoglein‐2 expression is an independent predictor of poor prognosis patients with multiple myeloma
Source: PubMed Central journal article supplement (PMC8936512; doi:10.1002/1878-0261.13055), 2021-07-24
Supplement: MOL2-16-1221-s001.pdf [file MOL2-16-1221-s001.pdf]

**Supplementary Table S1.** Summary of the multivariable Cox regression models based on dataset GSE4581 [Zhan et al, Blood 2006] for the effect of DSG2 expression on overall survival

| <b>Cox Model</b>           | <b>Model Covariates</b>                                                                                           | <b>Hazard Ratio</b> | <b>95% Confidence Interval</b> | <b>p value</b> |
|----------------------------|-------------------------------------------------------------------------------------------------------------------|---------------------|--------------------------------|----------------|
| Model 1<br>(all patients)  | <ul style="list-style-type: none"> <li>• DSG2 expression level</li> </ul>                                         | 2.69                | 1.73 – 4.18                    | < 0.001        |
| Model 2<br>(all patients)  | <ul style="list-style-type: none"> <li>• DSG2 expression level</li> <li>• Genetic subgroup</li> </ul>             | 3.03                | 1.75 – 5.25                    | < 0.001        |
| Model 3<br>(non-MS cohort) | <ul style="list-style-type: none"> <li>• DSG2 expression level</li> <li>• MS cohort</li> </ul>                    | 3.68                | 2.18 – 6.22                    | < 0.001        |
| Model 4<br>(all patients)  | <ul style="list-style-type: none"> <li>• DSG2 expression level</li> <li>• MS cohort</li> <li>• Therapy</li> </ul> | 4.30                | 2.47 – 7.48                    | < 0.001        |

**Supplementary Table S2.** The effect DSG2 expression on patient overall survival in each genetic subgroup using dataset GSE4581 and univariable Cox regression modelling

|                | <b>Genetic Grouping</b>                       | <b>Prognostic Significance</b> | <b>DSG2 (high/low)</b> | <b>Hazard Ratio</b> | <b>95% Confidence Interval</b> | <b>p value</b> | <b>Adjusted Confidence Interval (99%)</b> | <b>Adjusted p value</b> |
|----------------|-----------------------------------------------|--------------------------------|------------------------|---------------------|--------------------------------|----------------|-------------------------------------------|-------------------------|
| CD-1<br>(n=28) | Cyclin D1 and cyclin D3: t(11;14) and t(6;14) | Low-risk                       | 5 / 23                 | 6.60                | 0.91 – 47.56                   | 0.06           | 0.49 – 88.46                              | 0.37                    |
| CD-2<br>(n=59) | Cyclin D1 and cyclin D3: t(11;14) and t(6;14) | Low-risk                       | 12 / 48                | 0.62                | 0.07 – 5.18                    | 0.66           | 0.04 – 10.07                              | 4.00                    |
| HY<br>(n=116)  | Hyperdiploidy                                 | Low-risk                       | 12 / 104               | 3.21                | 1.04 – 9.92                    | 0.04           | 0.73 – 14.14                              | 0.26                    |
| LB<br>(n=58)   | Low bone disease                              | Low-risk                       | 4 / 54                 | 9.08                | 1.65 – 50.13                   | 0.01           | 0.96 – 85.75                              | 0.07                    |
| MF<br>(n=37)   | MAF: t(14;16) and t(14;20)                    | High-risk                      | 9 / 28                 | 8.76                | 1.70 – 45.20                   | 0.01           | 1.01 – 75.70                              | 0.06                    |
| MS<br>(n=68)   | MMSET: t(4;14)                                | High-risk                      | 66 / 2                 | Indeterminate       | Indeterminate                  | Indeterminate  |                                           |                         |
| PR<br>(n=47)   | Proliferation related                         | High-risk                      | 17 / 30                | 2.00                | 0.79 – 5.11                    | 0.15           | 0.59 – 6.85                               | 0.87                    |

**Supplementary Table S3.** Multivariable Cox regression model of the coMMpass study data for progression-free survival by DSG2 expression level and frontline therapy

| Therapy             | Median PFS (months) |                  | Multivariable Cox Regression<br>( <i>DSG2-high</i> vs <i>DSG2-low</i> ) |
|---------------------|---------------------|------------------|-------------------------------------------------------------------------|
|                     | <i>DSG2-low</i>     | <i>DSG2-high</i> |                                                                         |
| <i>Bortezomib</i>   | 22                  | 15               | HR 1.49, CI 1.10 – 2.03, P = 0.01                                       |
| <i>Carfilzomib</i>  | NR                  | 26               | HR 2.41, CI 0.64 – 9.10, P = 0.19                                       |
| <i>Lenalidomide</i> | 21                  | 22               | HR 1.20, CI 0.67 – 2.13, P = 0.55                                       |

**Supplementary Table S4.** Multivariable Cox regression model of the coMMpass study data for overall survival by DSG2 expression level and frontline therapy

| Therapy             | Median OS (months) |                  | Multivariable Cox Regression<br>( <i>DSG2-high</i> vs <i>DSG2-low</i> ) |
|---------------------|--------------------|------------------|-------------------------------------------------------------------------|
|                     | <i>DSG2-low</i>    | <i>DSG2-high</i> |                                                                         |
| <i>Bortezomib</i>   | 58                 | 36               | HR 1.86, CI 1.27 – 2.71, P < 0.01                                       |
| <i>Carfilzomib</i>  | NR                 | NR               | HR 1.17, CI 0.20 – 7.04, P = 0.86                                       |
| <i>Lenalidomide</i> | 60                 | 61               | HR 1.00, CI 0.41 – 2.38, P = 0.99                                       |

**Supplementary Table S5.** Correlation of DSG2 expression on patient MM PC against routinely measured blood parameters.

| <b>Biomarker</b>                                            | <b>Linear Regression<br/>(p value)</b> | <b>Pearson Correlation<br/>(r value, p value)</b> |
|-------------------------------------------------------------|----------------------------------------|---------------------------------------------------|
| Paraprotein                                                 | 0.151                                  | - 0.091, 0.543                                    |
| $\kappa$ light chain                                        | 0.549                                  | - 0.090, 0.549                                    |
| $\lambda$ light chain                                       | 0.488                                  | 0.104, 0.488                                      |
| $\kappa$ : $\lambda$ ratio                                  | 0.655                                  | -0.067, 0.655                                     |
| Haemoglobin                                                 | 0.131                                  | - 0.224, 0.131                                    |
| White cell count                                            | 0.518                                  | 0.097, 0.518                                      |
| Platelet count                                              | 0.700                                  | 0.058, 0.700                                      |
| $\beta_2$ -microglobulin                                    | 0.425                                  | -0.027, 0.860                                     |
| Urea                                                        | 0.738                                  | 0.051, 0.738                                      |
| Creatinine                                                  | 0.558                                  | 0.088, 0.558                                      |
| Calcium                                                     | 0.929                                  | -0.013, 0.929                                     |
| Albumin                                                     | 0.143                                  | -0.217, 0.143                                     |
| Lactate dehydrogenase                                       | 0.168                                  | -0.135, 0.365                                     |
| Plasma cell percentage (marrow aspirate)                    | 0.154                                  | -0.055, 0.716                                     |
| Plasma cell percentage (CD138 <sup>+</sup> IHC of trephine) | 0.442                                  | -0.145, 0.331                                     |
