# Supplementary material for: Desmoglein‐2 expression is an independent predictor of poor prognosis patients with multiple myeloma
Source: PubMed Central journal article supplement (PMC8936512; doi:10.1002/1878-0261.13055), 2021-07-24
Supplement: MOL2-16-1221-s002.pdf [file MOL2-16-1221-s002.pdf]

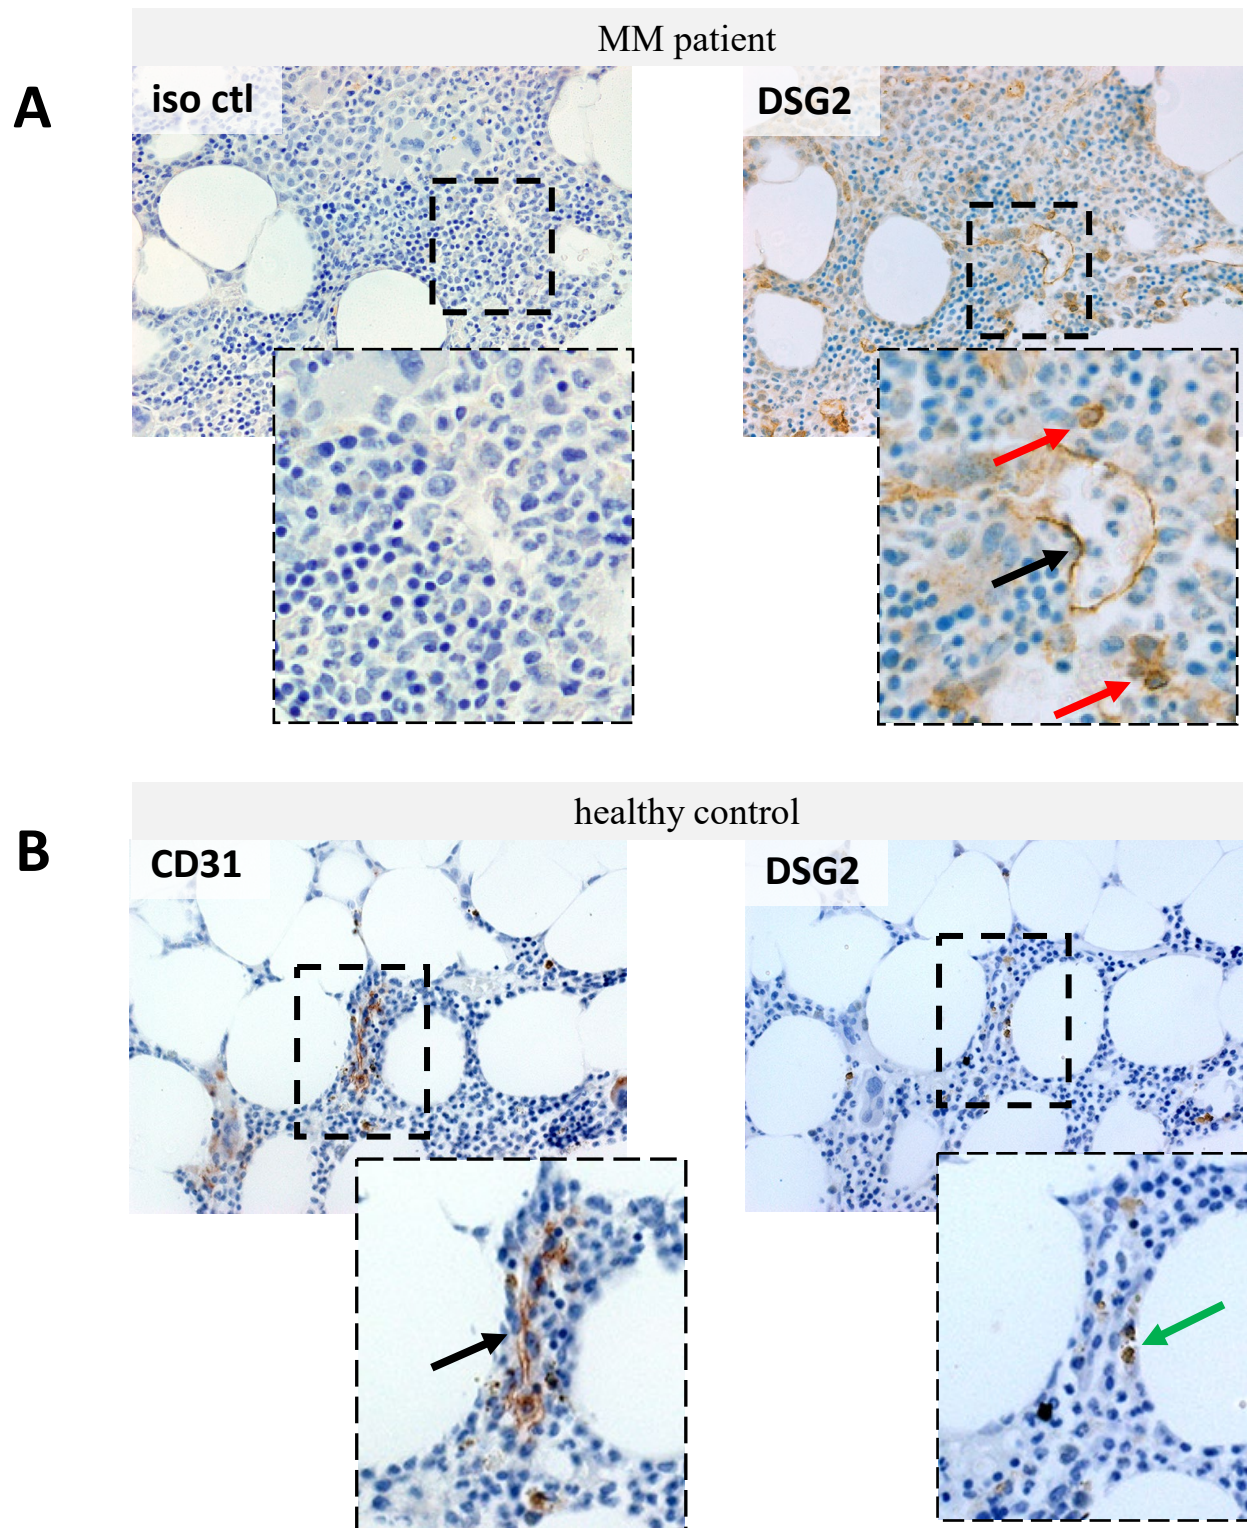

**Supplementary Figure S1: DSG2 expression on MM PCs and BM ECs.** BM trephine biopsies from a MM patient in (A) and a healthy donor in (B), stained for DSG2 by immunohistochemistry; a representative example shows the isotype control (iso ctl) and DSG2 stained section with a DSG2-expressing blood vessel (black arrow) and MM PC (red arrows). In (B), a serial section was stained for CD31 to identify BM vasculature (black arrow) and DSG2 positive progenitor cells (green arrow).
